# Supplementary material for: Association between Biomarkers (VEGF-R2, VEGF-R3, VCAM-1) and Treatment Duration in Patients with Neuroendocrine Tumors Receiving Therapy with First-Generation Somatostatin Analogues
Source: MDPI journal article supplement (doi:10.3390/biomedicines11030842), 2023-03-10
Supplement: s1 [file s1]

# Supplementary Material

## Association between Biomarkers (VEGF-R2, VEGF-R3, VCAM-1), and Treatment Duration in Neuroendocrine Tumors Patients Receiving Therapy with First-Generation Somatostatin Analogues

Violetta Rosiek \*, Ksenia Janas and Beata Kos-Kudła

Department of Endocrinology and Neuroendocrine Tumors, Department of Pathophysiology and Endocrinology, Medical University of Silesia, 40-514 Katowice, Poland; Ksenia.janas@sum.edu.pl (K.J.); bkoskudla@sum.edu.pl (B.K.-K.)

\* Correspondence: vrosiek@sum.edu.pl

### 1. Supplemental Tables

**Table S1.** Vascular endothelial growth factor receptor 2 (VEGF-R2), vascular endothelial growth factor receptor 3 (VEGF-R3), and vascular cell adhesion molecule-1 (VCAM-1) in patients with neuroendocrine tumors (NET) treated with somatostatin analogues (SSAs).

| Variable                         | Group B<br>n = 56   | Group C<br>n = 55   | Group D<br>n = 46   | Group E<br>n = 35   | Group F<br>n = 26   | Group G<br>n = 22   | Friedman test<br>(chi-square) test |         |
|----------------------------------|---------------------|---------------------|---------------------|---------------------|---------------------|---------------------|------------------------------------|---------|
|                                  |                     |                     |                     |                     |                     |                     | $\chi^2$                           | p       |
|                                  | Median<br>(IR)      |                     |                     |                     |                     |                     |                                    |         |
| <b>VEGF-R2</b><br><b>(pg/mL)</b> | 7717<br>(6567-8662) | 7150<br>(6420-8109) | 7067<br>(6430-8244) | 6541<br>(5747-8193) | 6113<br>(5157-8751) | 6345<br>(5781-7751) | 84.60                              | < 0.001 |
| <b>VEGF-R3</b><br><b>(ng/mL)</b> | 65<br>(59-73)       | 65<br>(46-81)       | 67<br>(58-80)       | 66<br>(48-75)       | 60<br>(51-66)       | 54<br>(46-66)       | 83.66                              | < 0.001 |
| <b>VCAM-1</b><br><b>(ng/mL)</b>  | 667<br>(595-838)    | 764<br>(605-978)    | 803<br>(630-946)    | 688<br>(587-1036)   | 675<br>(565-785)    | 693<br>(554-816)    | 88.86                              | < 0.001 |

\* Results are presented as median (and quartiles), where appropriate. Abbreviations: see table 2.

**Table S2.** Spearman Rank Correlations. Spearman's coefficients of the relationships among analyzed variables in NET patients: (red correlations statistically significant,  $p < 0.05$ ).

| Variables                      | Treatment duration<br>(months) | VEGF-R2<br>(pg/mL) | VEGF-R3<br>(ng/mL) | VCAM-1<br>(ng/mL) |
|--------------------------------|--------------------------------|--------------------|--------------------|-------------------|
| Treatment duration<br>(months) | 1.00                           | <b>-0.19</b>       | -0.07              | -0.05             |
| VEGF-R2 (pg/mL)                | -0.19                          | 1.00               | <b>0.42</b>        | <b>-0.26</b>      |
| VEGF-R3 (ng/mL)                | -0.07                          | 0.42               | 1.00               | <b>0.29</b>       |
| VCAM-1 (ng/mL)                 | -0.05                          | -0.26              | 0.29               | 1.00              |

Abbreviations: VEGF-R2, vascular endothelial growth factor receptor 2; VEGF-R3, vascular endothelial growth factor receptor 3; VCAM-1, vascular cell adhesion molecule 1.

**Table S3.** The capacity of vascular endothelial growth factor receptor 2 (VEGF-R2), vascular endothelial growth factor receptor 3 (VEGF-R3), and vascular cell adhesion molecule-1 (VCAM-1) for differentiating SSA-treated vs. non-treated NET patients.

| Variable               | AUC  | SE   | 95% CI    | p            |
|------------------------|------|------|-----------|--------------|
| <b>VEGF-R2 (pg/mL)</b> |      |      |           |              |
| Group B vs. Group C    | 0.42 | 0.05 | 0.31-0.52 | NS           |
| Group B vs. Group D    | 0.43 | 0.06 | 0.31-0.54 | NS           |
| Group B vs. Group E    | 0.37 | 0.06 | 0.25-0.50 | <b>0.046</b> |
| Group B vs. Group F    | 0.36 | 0.08 | 0.21-0.50 | NS           |
| Group B vs. Group G    | 0.30 | 0.07 | 0.17-0.43 | <b>0.003</b> |
| <b>VEGF-R3 (ng/mL)</b> |      |      |           |              |
| Group B vs. Group C    | 0.51 | 0.06 | 0.40-0.62 | NS           |
| Group B vs. Group D    | 0.55 | 0.06 | 0.44-0.66 | NS           |
| Group B vs. Group E    | 0.50 | 0.06 | 0.38-0.63 | NS           |
| Group B vs. Group F    | 0.42 | 0.07 | 0.29-0.56 | NS           |
| Group B vs. Group G    | 0.37 | 0.08 | 0.21-0.53 | NS           |
| <b>VCAM-1 (ng/mL)</b>  |      |      |           |              |
| Group B vs. Group C    | 0.60 | 0.05 | 0.49-0.71 | NS           |
| Group B vs. Group D    | 0.61 | 0.06 | 0.50-0.72 | <b>0.048</b> |
| Group B vs. Group E    | 0.55 | 0.07 | 0.42-0.68 | NS           |
| Group B vs. Group F    | 0.45 | 0.07 | 0.31-0.59 | NS           |
| Group B vs. Group G    | 0.50 | 0.07 | 0.36-0.64 | NS           |

Abbreviations: NS, not significant, CI, confidential interval, AUC, area under the curve; SE, standard error.

**Table S4.** Vascular endothelial growth factor receptor 2 (VEGF-R2), vascular endothelial growth factor receptor 3 (VEGF-R3), and vascular cell adhesion molecule-1 (VCAM-1) levels depending on the grade, and stage of the disease.

| Variable                            |    | Median | IR          | p-value* |
|-------------------------------------|----|--------|-------------|----------|
| VEGF-R2 (pg/mL)                     |    |        |             |          |
| Tumor grade                         | G1 | 7799   | 6766 - 8636 | NS       |
|                                     | G2 | 7297   | 6006 - 8845 |          |
| Tumor grade, final measurement      | G1 | 6346   | 5588 - 7814 | NS       |
|                                     | G2 | 6343   | 6024 - 6627 |          |
| Stage of disease                    | SD | 7824   | 6653 - 8587 | NS       |
|                                     | PD | 7712   | 6463 – 8845 |          |
| Stage of disease, final measurement | SD | 5925   | 4809 - 7304 | NS       |
|                                     | PD | 6346   | 5781 - 7814 |          |

|                                     |    | VEGF-R3 (ng/mL) |            |    |
|-------------------------------------|----|-----------------|------------|----|
| Tumor grade                         | G1 | 67              | 60 - 73    | NS |
|                                     | G2 | 60              | 47 – 73    |    |
| Tumor grade, final measurement      | G1 | 53              | 46 – 83    | NS |
|                                     | G2 | 55              | 51 - 60    |    |
| Stage of disease                    | SD | 62              | 47 – 72    | NS |
|                                     | PD | 68              | 60 – 75    |    |
| Stage of disease, final measurement | SD | 53              | 46 – 66    | NS |
|                                     | PD | 55              | 46 - 83    |    |
|                                     |    | VCAM-1 (ng/mL)  |            |    |
| Tumor grade                         | G1 | 664             | 582 – 835  | NS |
|                                     | G2 | 680             | 608 - 842  |    |
| Tumor grade, final measurement      | G1 | 678             | 544 - 765  | NS |
|                                     | G2 | 816             | 675 - 1143 |    |
| Stage of disease                    | SD | 700             | 506 - 773  | NS |
|                                     | PD | 664             | 609 – 872  |    |
| Stage of disease, final measurement | SD | 846             | 554 - 1015 | NS |
|                                     | PD | 678             | 544 - 765  |    |

\* Mann-Whitney test; Abbreviations: IR, interquartile range; PD, progressive disease; SD, stable disease.

## 2. Supplemental Figures

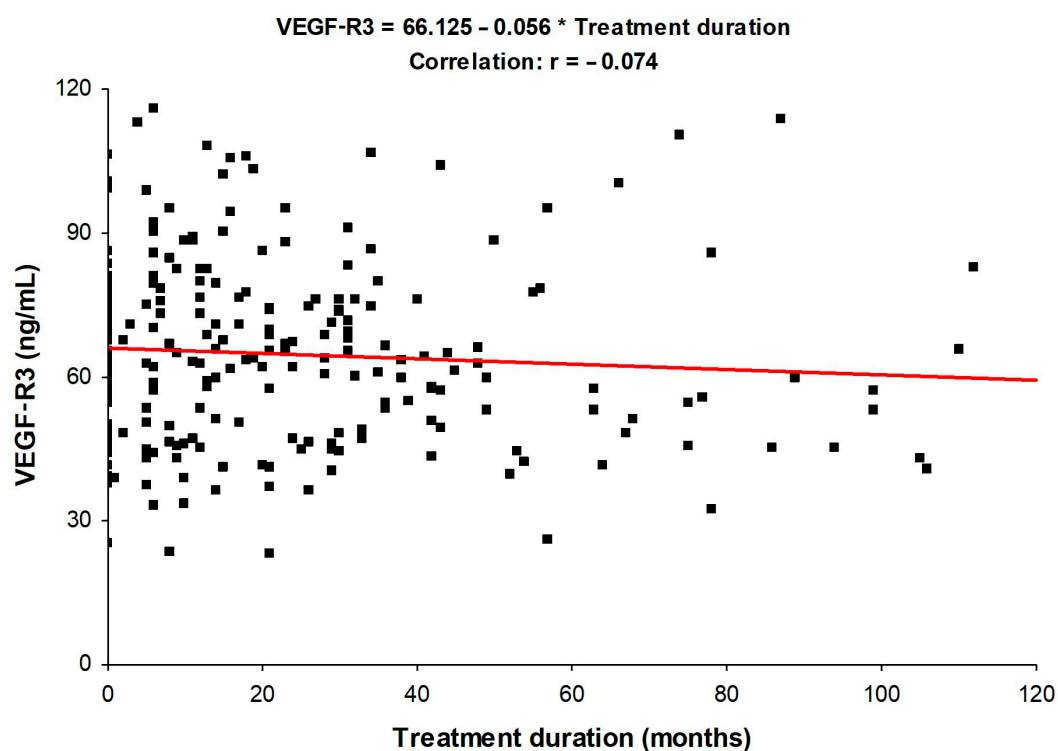

**Figure S1.** Spearman's Rank Correlations. Spearman's coefficients of the relationships among analyzed variables in NET patients: VEGF-R3 vs. Treatment duration (the presented correlation is not statistically significant,  $p > 0.05$ ).

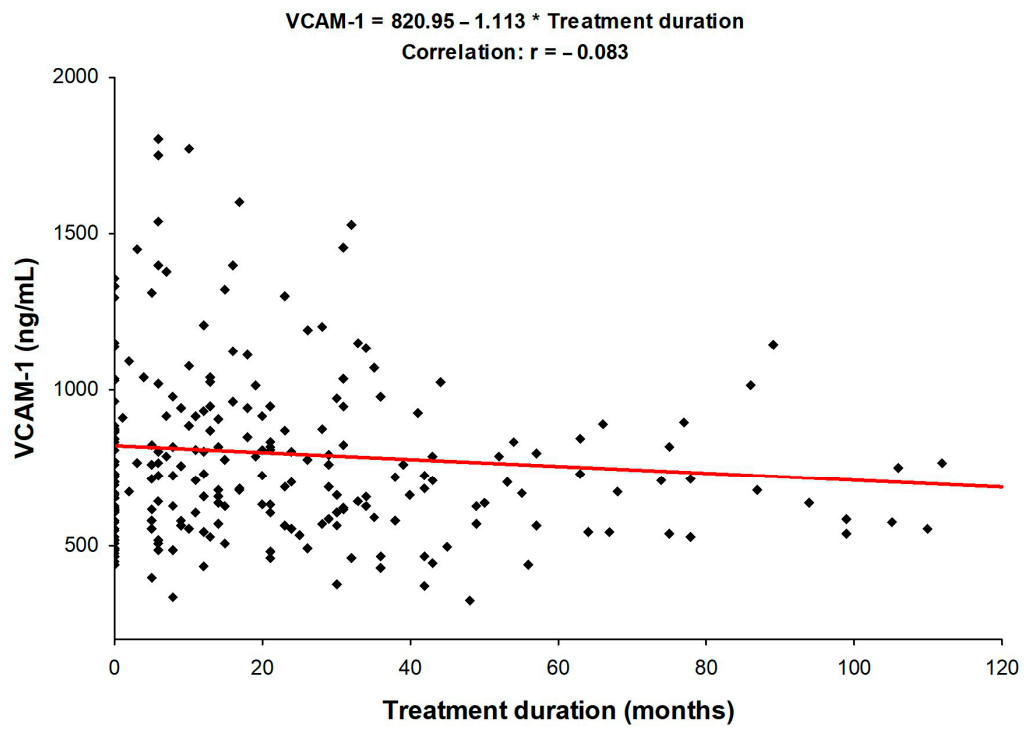

**Figure S2.** Spearman's Rank Correlations Spearman's coefficients of the relationships among analyzed variables in NET patients: VCAM-1 vs. Treatment duration (the presented correlation is not statistically significant,  $p > 0.05$ ).
